# Supplementary material for: Managing antibiotics wisely: a quality improvement programme in a tertiary neonatal unit in the UK
Source: PubMed Central journal article supplement — BMJ Open Qual. 2018 May 7;7(2):e000285. doi: 10.1136/bmjoq-2017-000285 (PMC5942449; doi:10.1136/bmjoq-2017-000285), 2018-05-07
Supplement: bmjoq-2017-000285supp001.pdf [file bmjoq-2017-000285supp001.pdf]

## Appendix 1: Guidance for non-initiation of antibiotics in low-risk cases

For babies admitted to NICU at Singleton Hospital only, consider withholding antibiotics with enhanced monitoring in following scenarios

**(Only applicable for babies admitted to the NICU in first 24 hours of life).**

*Babies should meet all of the criteria below in each of their gestational age categories*

| ≥ 34 weeks gestation                                                                  | ≥ 32 weeks gestation                    | ≥ 30 weeks gestation                                           |
|---------------------------------------------------------------------------------------|-----------------------------------------|----------------------------------------------------------------|
| Respiratory distress in keeping with gestational age                                  | All of criteria of ≥ 34 weeks gestation | All of criteria of ≥ 32 weeks gestation                        |
| No history of chorioamnionitis or sepsis in mother                                    | No pre-labour rupture of membranes      | Baby delivered by section for maternal reasons (e.g. PET, APH) |
| No previous siblings affected by GBS                                                  |                                         |                                                                |
| If GBS isolated from HVS, Mother must have had IAP at least 4 hours prior to delivery |                                         |                                                                |

**All babies who meets the above criteria:**

- Full examination of the baby by a clinician, including temperature, heart rate, perfusion, blood pressure and blood gas soon after admission
- Take CRP, FBC, blood gas and culture (take at least 1 ml for blood culture and clearly document in notes)

**At 6 hours (earlier, if nursing concerns):**

- Repeat clinical review by clinician, documenting (perfusion, BP, HR, temp, alertness, wellbeing and HeRO score)
- Repeat CRP and blood gas
- Consider 1<sup>st</sup> line antibiotics if there are concerns regarding worsening respiratory or haemodynamic status, rising CRP or metabolic acidosis or other concerns of sepsis

**At 6-24 hours:**

- Continue close review and document every 6 hours for the first 24 hours
- Repeat CRP at 18-24 hrs

*Please ensure all the findings and decisions are clearly documented in the notes and be aware of clinical symptoms and signs of evolving sepsis ( see next page)*
