# Supplementary figures and images for: Managing antibiotics wisely: a quality improvement programme in a tertiary neonatal unit in the UK
Source: PubMed Central journal article supplement — BMJ Open Qual. 2018 May 7;7(2):e000285. doi: 10.1136/bmjoq-2017-000285 (PMC5942449; doi:10.1136/bmjoq-2017-000285), 2018-05-07

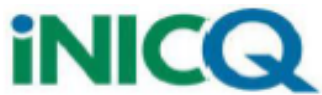

## Reducing antibiotic usage on the neonatal unit

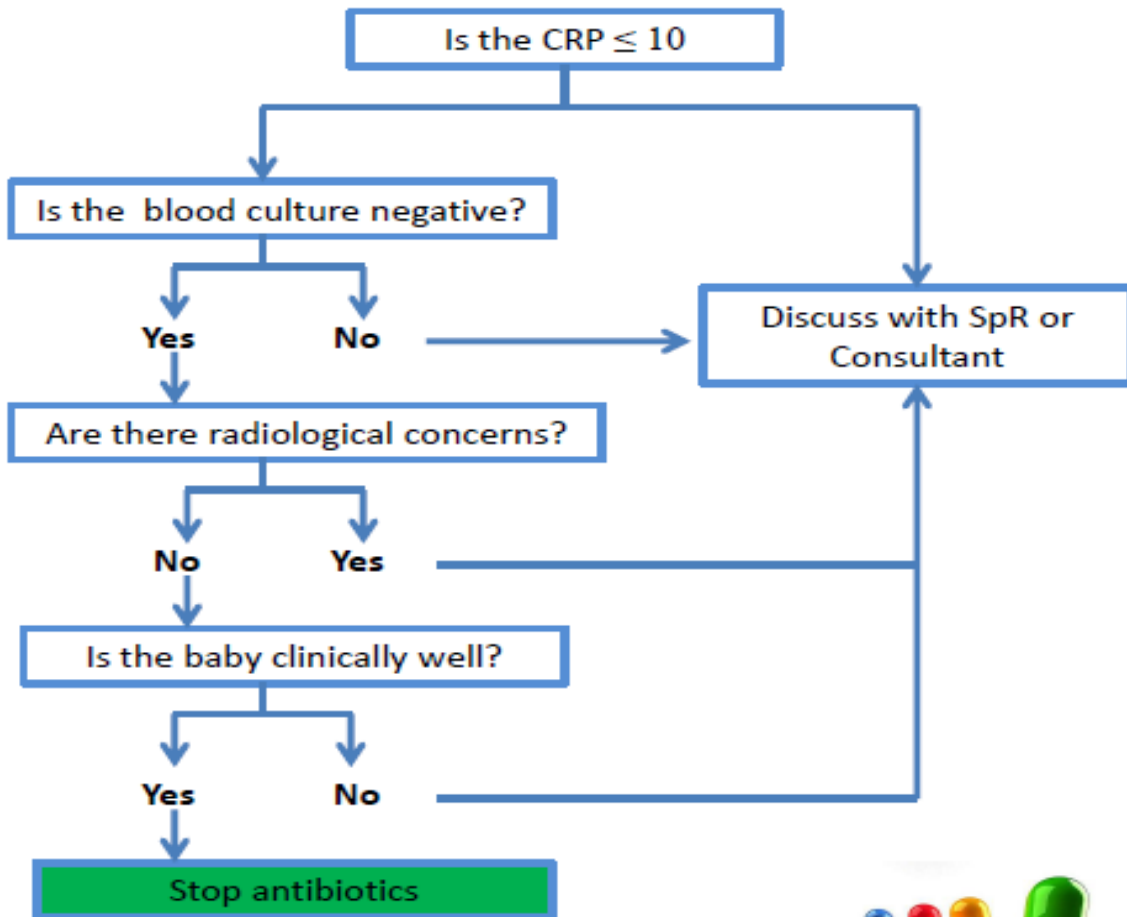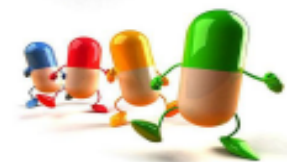

Supplement: bmjoq-2017-000285supp002.pdf [file bmjoq-2017-000285supp002.pdf]
